# Supplementary material for: A Pilot Study to Investigate the Balance between Proteases and α1-Antitrypsin in Bronchoalveolar Lavage Fluid of Lung Transplant Recipients
Source: PubMed Central journal article supplement (PMC6480715; doi:10.3390/ht8010005), 2019-02-13
Supplement: high-throughput-08-00005-s001.pdf [file high-throughput-08-00005-s001.pdf]

| ACCESSION | MASS      | SCORE(%) | COVERAGE(%) | DESCRIPTION                            | M/Z | Z | PEPTIDE        |
|-----------|-----------|----------|-------------|----------------------------------------|-----|---|----------------|
| sp P01009 | 46,737    | 99       | 14,83%      | Alpha-1-antitrypsin<br>OS=Homo sapiens |     |   |                |
|           | 1345,9855 |          |             |                                        | 674 | 2 | RLGMFNIQHCK    |
|           | 920,99274 |          |             |                                        | 922 | 1 | FLENEDR        |
|           | 1777,9855 |          |             |                                        | 890 | 2 | TDTSHHDQDHPFNK |
|           | 1331,9783 |          |             |                                        | 445 | 3 | LVDKFLEDVKK    |
|           | 1077,9855 |          |             |                                        | 540 | 2 | FLENEDRR       |
|           | 1544,9783 |          |             |                                        | 516 | 3 | SPLFMGKVVNPTQK |
|           | 851,9855  |          |             |                                        | 427 | 2 | SASLHLPK       |
|           | 1317,9855 |          |             |                                        | 660 | 2 | LGMFNIQHCKK    |
| sp P08246 | 28,518    | 62       | 4,87%       | Neutrophil elastase<br>OS=Homo sapiens |     |   |                |
|           | 1545,9855 |          |             |                                        | 774 | 2 | AVRVVLGAHNLSRR |
|           | 1389,9855 |          |             |                                        | 696 | 2 | AVRVVLGAHNLSR  |

Table S1. Primary sequence of all peptides identified for each protein

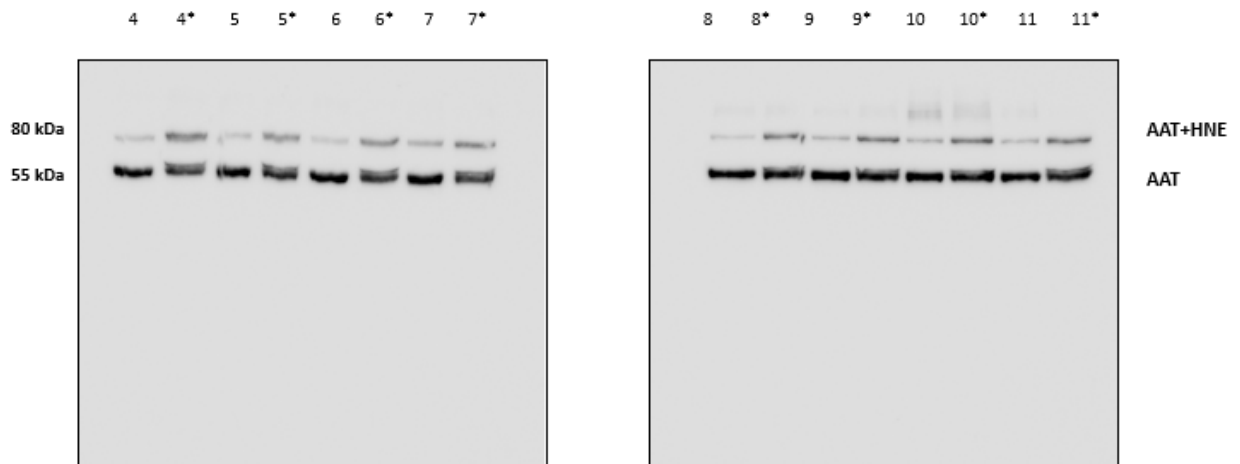

Figure S1- Western blotting of BALf from patients with the 80 kDa band before and after incubation with exogenous HNE\* (left to right in both panels).
